# Supplementary material for: Heterojunction-Based Photocatalytic Degradation of Rose Bengal Dye via Gold-Decorated α-Fe2O3-CeO2 Nanocomposites under Visible-Light Irradiation
Source: MDPI journal article supplement (doi:10.3390/w16101334), 2024-05-08
Supplement: s1 [file s1]

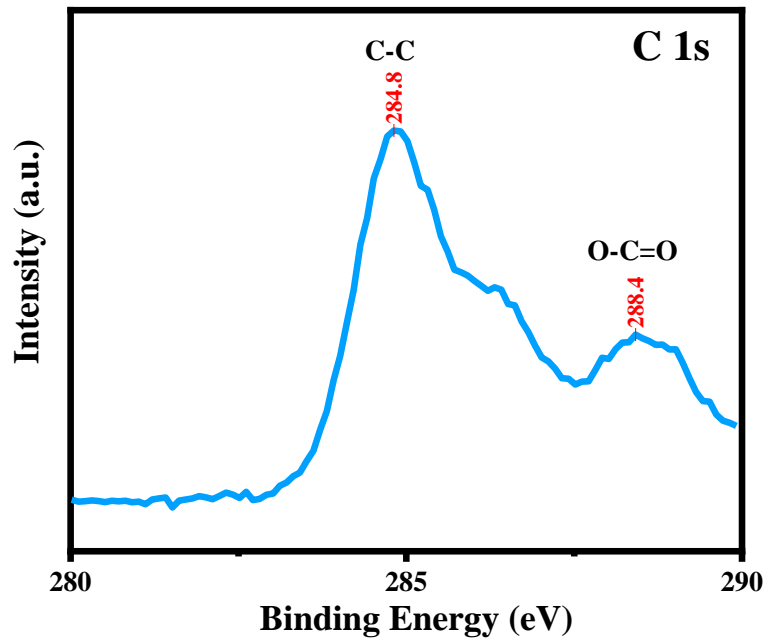

**Figure S1.** High-resolution XPS spectra of C 1s for  $\alpha$ -Fe<sub>2</sub>O<sub>3</sub>-CeO<sub>2</sub>@Au nanocomposite

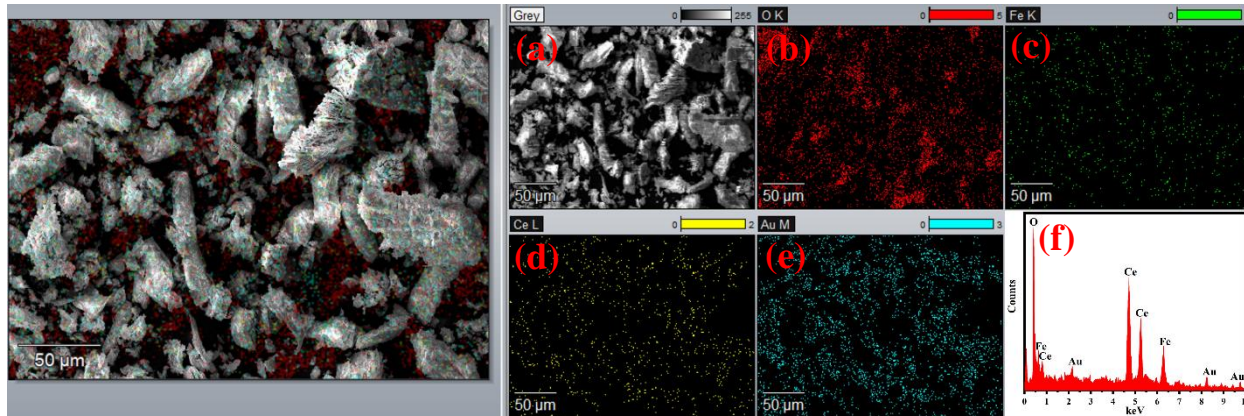

**Figure S2.** (a) SEM image, Elemental mapping for (b) O atoms, (c) Fe atoms, (d), Ce atoms, and (e) Au atoms; and (f) Energy-dispersive X-ray (EDX) spectra analyses of  $\alpha$ -Fe<sub>2</sub>O<sub>3</sub>-CeO<sub>2</sub>@Au nanocomposite.

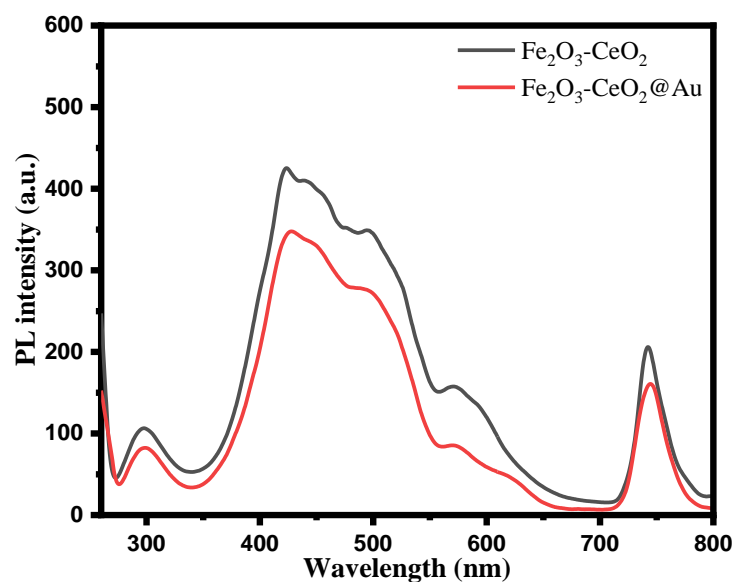

**Figure S3.** PL (photoluminescence) spectra of  $\alpha$ -Fe<sub>2</sub>O<sub>3</sub>-CeO<sub>2</sub> and  $\alpha$ -Fe<sub>2</sub>O<sub>3</sub>-CeO<sub>2</sub>@Au NCs

**Table S1.** Literature survey of Fe<sub>2</sub>O<sub>3</sub>-based heterojunction in photodegradation of toxic dyes

| Photocatalyst                                                                                    | Toxic Dye          | Degradation Time | Source of light | Degradation (%) | Ref. |
|--------------------------------------------------------------------------------------------------|--------------------|------------------|-----------------|-----------------|------|
| ZnO/Fe <sub>2</sub> O <sub>3</sub>                                                               | Methyl orange (MO) | 90 min           | UV              | 95%             | 109  |
| CuFe <sub>2</sub> O <sub>4</sub> /α-Fe <sub>2</sub> O <sub>3</sub>                               | Methyl Blue (MB)   | 120 min          | solar           | 91 %            | 110  |
| α-Fe <sub>2</sub> O <sub>3</sub> /g-C <sub>3</sub> N <sub>4</sub> /SiO <sub>2</sub>              | Rhodamine B (RhB)  | 120 min          | visible         | 97%             | 111  |
| Fe <sub>2</sub> O <sub>3</sub> /MoS <sub>2</sub>                                                 | Acid Blue 113      | 45 min           | visible         | 99 %            | 112  |
| g-C <sub>3</sub> N <sub>4</sub> /α-Fe <sub>2</sub> O <sub>3</sub>                                | Methyl orange (MO) | 300 min          | visible         | 97%             | 113  |
| g-C <sub>3</sub> N <sub>4</sub> /α-Fe <sub>2</sub> O <sub>3</sub> /V <sub>2</sub> O <sub>5</sub> | Methyl Blue (MB)   | 90 min           | visible         | 87.5%           | 114  |
| cellulose/γ-Fe <sub>2</sub> O <sub>3</sub> -ZrO <sub>2</sub>                                     | Congo red (CR)     | 30 min.          | visible         | 98.5%           | 115  |
| α-Fe <sub>2</sub> O <sub>3</sub> @CeO <sub>2</sub>                                               | Rose Bengal (RB)   | 75 min           | UV              | 93%             | 34   |
| CeO <sub>2</sub> -Fe <sub>2</sub> O <sub>3</sub> -NiO                                            | Methyl Blue (MB)   | 50 min           | sunlight        | 73%             | 116  |
| γ-Fe <sub>2</sub> O <sub>3</sub> @Au/MoS <sub>2</sub>                                            | Methyl Blue (MB)   | 4 h              | green           | 98 %            | 117  |

|                                                                |                  |         |         |     |              |
|----------------------------------------------------------------|------------------|---------|---------|-----|--------------|
| $\alpha$ -Fe <sub>2</sub> O <sub>3</sub> / BaTiO <sub>3</sub>  | Methyl Blue (MB) | 3 h     | solar   | 93% | 118          |
| Au@ $\alpha$ -Fe <sub>2</sub> O <sub>3</sub> -CeO <sub>2</sub> | Rose Bengal (RB) | 120 min | visible | 89% | Present work |

**Table S2.** Pseudo-first-order reaction rate constants (k) and half-lives for the photocatalytic degradation of RB by  $\alpha$ -Fe<sub>2</sub>O<sub>3</sub>-CeO<sub>2</sub>@Au photocatalyst at various catalyst concentrations and initial concentrations under visible light for 120 min at pH of 7 and 30 °C

| Catalyst concentration<br>(mg/L) | k<br>(min <sup>-1</sup> ) | t <sub>1/2</sub><br>(min) | Dye concentration<br>(mg/L) | k<br>(min <sup>-1</sup> ) | t <sub>1/2</sub><br>(min) |
|----------------------------------|---------------------------|---------------------------|-----------------------------|---------------------------|---------------------------|
| 20                               | 0.00895                   | 77.43                     | 20                          | 0.01789                   | 38.73                     |
| 30                               | 0.01127                   | 61.49                     | 30                          | 0.01326                   | 52.26                     |
| 40                               | 0.01395                   | 49.67                     | 40                          | 0.01127                   | 61.49                     |
| 50                               | 0.01789                   | 38.73                     | 50                          | 0.00851                   | 81.43                     |

**Table S3.** Estimated band gap (E<sub>g</sub>), conduction band (E<sub>CB</sub>), and valence band (E<sub>VB</sub>) of as-synthesized samples.

| Samples                                  | $\chi$ (eV) | E <sub>g</sub> (eV) | E <sub>CB</sub> (eV) | E <sub>VB</sub> (eV) |
|------------------------------------------|-------------|---------------------|----------------------|----------------------|
| $\alpha$ -Fe <sub>2</sub> O <sub>3</sub> | 5.87        | 1.92                | 0.41                 | 2.33                 |
| CeO <sub>2</sub>                         | 5.56        | 2.80                | -0.34                | 2.46                 |
